# Supplementary material
Source: Springer Nature journal article supplement (https://www.springermedizin.de/resource/supplementary/13020_2013_207_MOESM2_ESM.pdf/9641206)

**(A) Melphalan treated HepG2 cells**

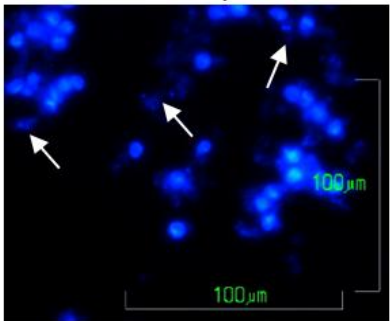

(41.6±2.1%)

**(B) *C. formosum* treated HepG2 cells**

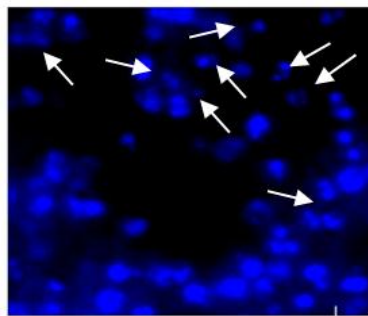

(62.2±4.5%)

**(C) Control HepG2 cells (untreated)**

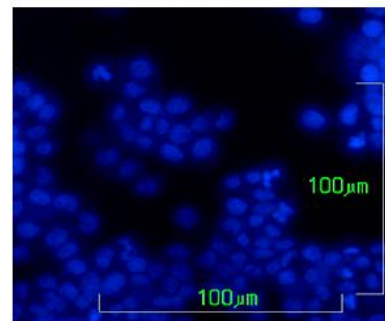

(0%)

Supplement: MOESM2 [file 9641206]
